# Supplementary material for: PGC-1α repression dysregulates lipid metabolism and induces lipid droplet accumulation in the retinal pigment epithelium
Source: PubMed Central journal article supplement (PMC11144268; doi:10.1038/s41419-024-06762-y), 2024-06-01
Supplement: 41419_2024_6762_MOESM1_ESM.pdf [file 41419_2024_6762_MOESM1_ESM.pdf]

Supplementary Figure 1

ARPE19-*PGC1A*-Cas9

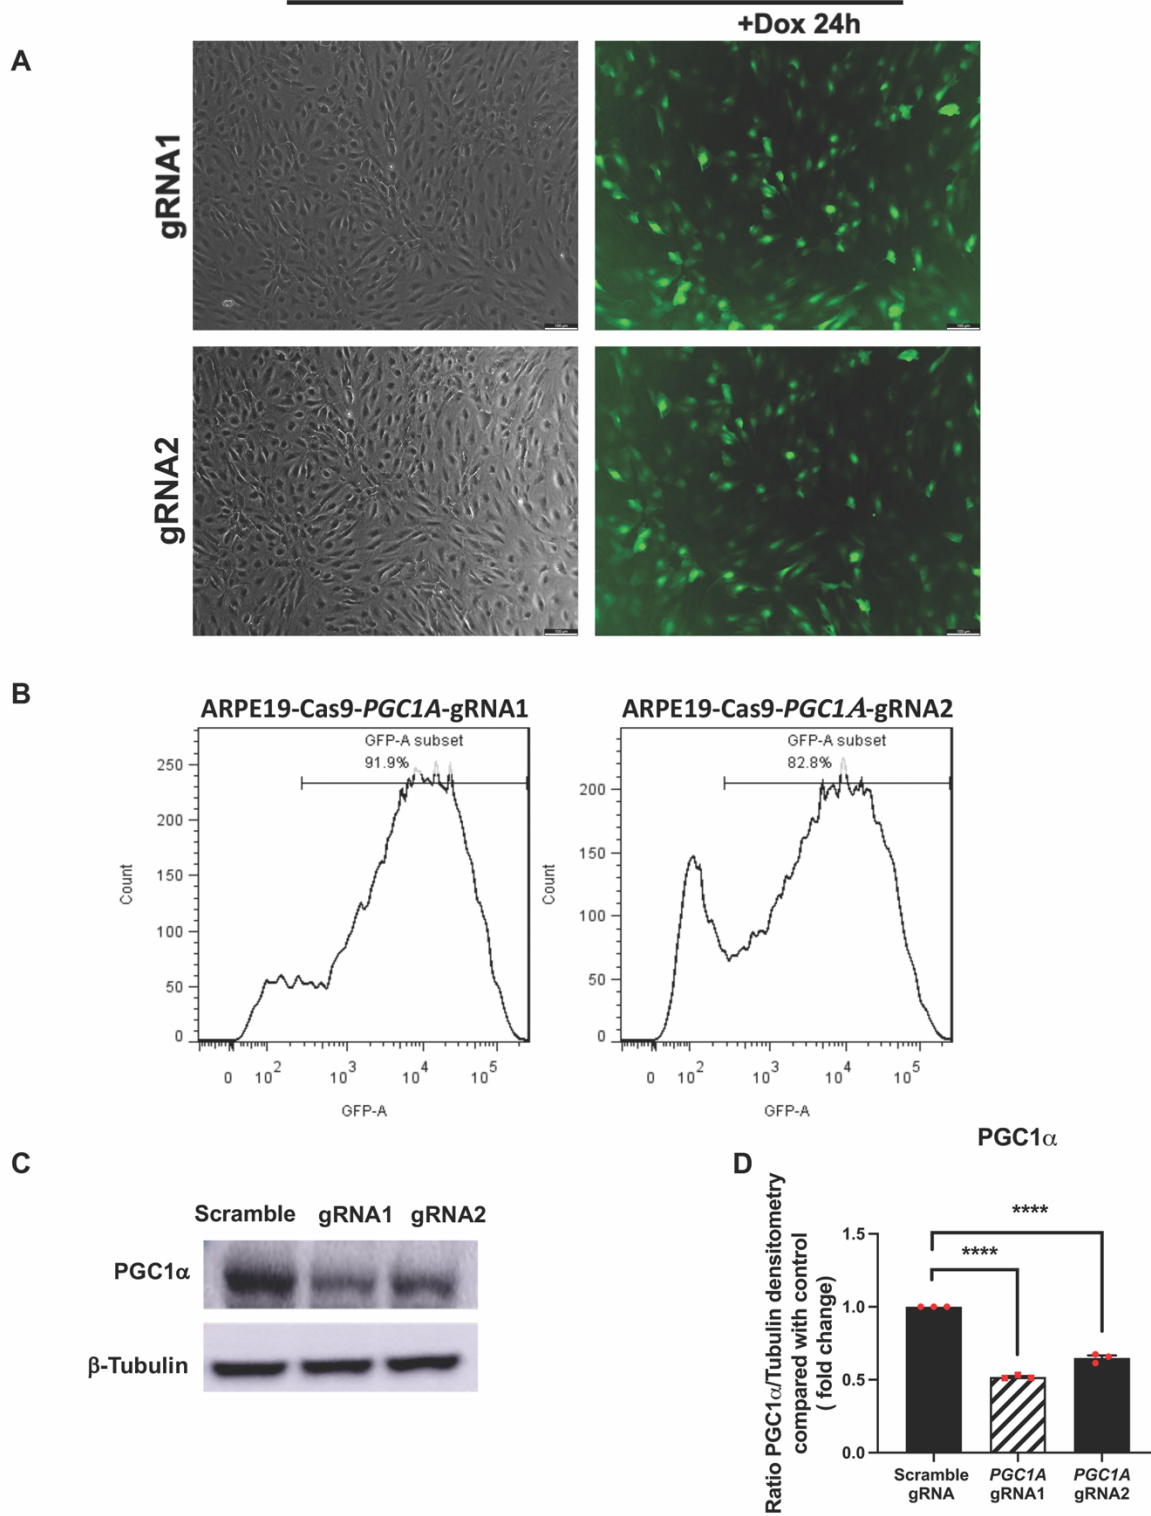

**S-Figure-1. Identification of ARPE19-*PGC1A* KO cells using CRISPR/Cas9 gene editing.**

ARPE19 cells were transfected with CRISPR/Cas9-*PGC1A* sgRNAs vectors and selected by 2 $\mu$ g/ml puromycin for 2 weeks. **(A)** ARPE19-*PGC1A* KO cells were incubated with 2 $\mu$ M Doxycycline (DOX) for 24h to test the eGFP to confirm the expression of Cas9 (Scale bars:100 $\mu$ m). **(B)** Flow cytometry was performed to analyze the ratio of Cas9-eGFP cells upon 2 $\mu$ M doxycycline treatment for 48h. **(C-D)** *PGC1 $\alpha$*  protein levels in Scramble control and 2 different sgRNA groups were analyzed by Western Blots. *PGC1 $\alpha$*  protein was inhibited ~ 49% by sgRNA1 and 35% by sgRNA2 as compared with the control group. We chose gRNA1 for all of our experiments. The densitometry analysis was completed using ImageJ software. Ordinary one-way ANOVA with Dunnett's multiple comparisons were performed using GraphPad Prism 8.3.0. Graph represents mean $\pm$ SD, n=3, \*\*\*\* $P$ <0.0001.

# Supplementary Figure 2

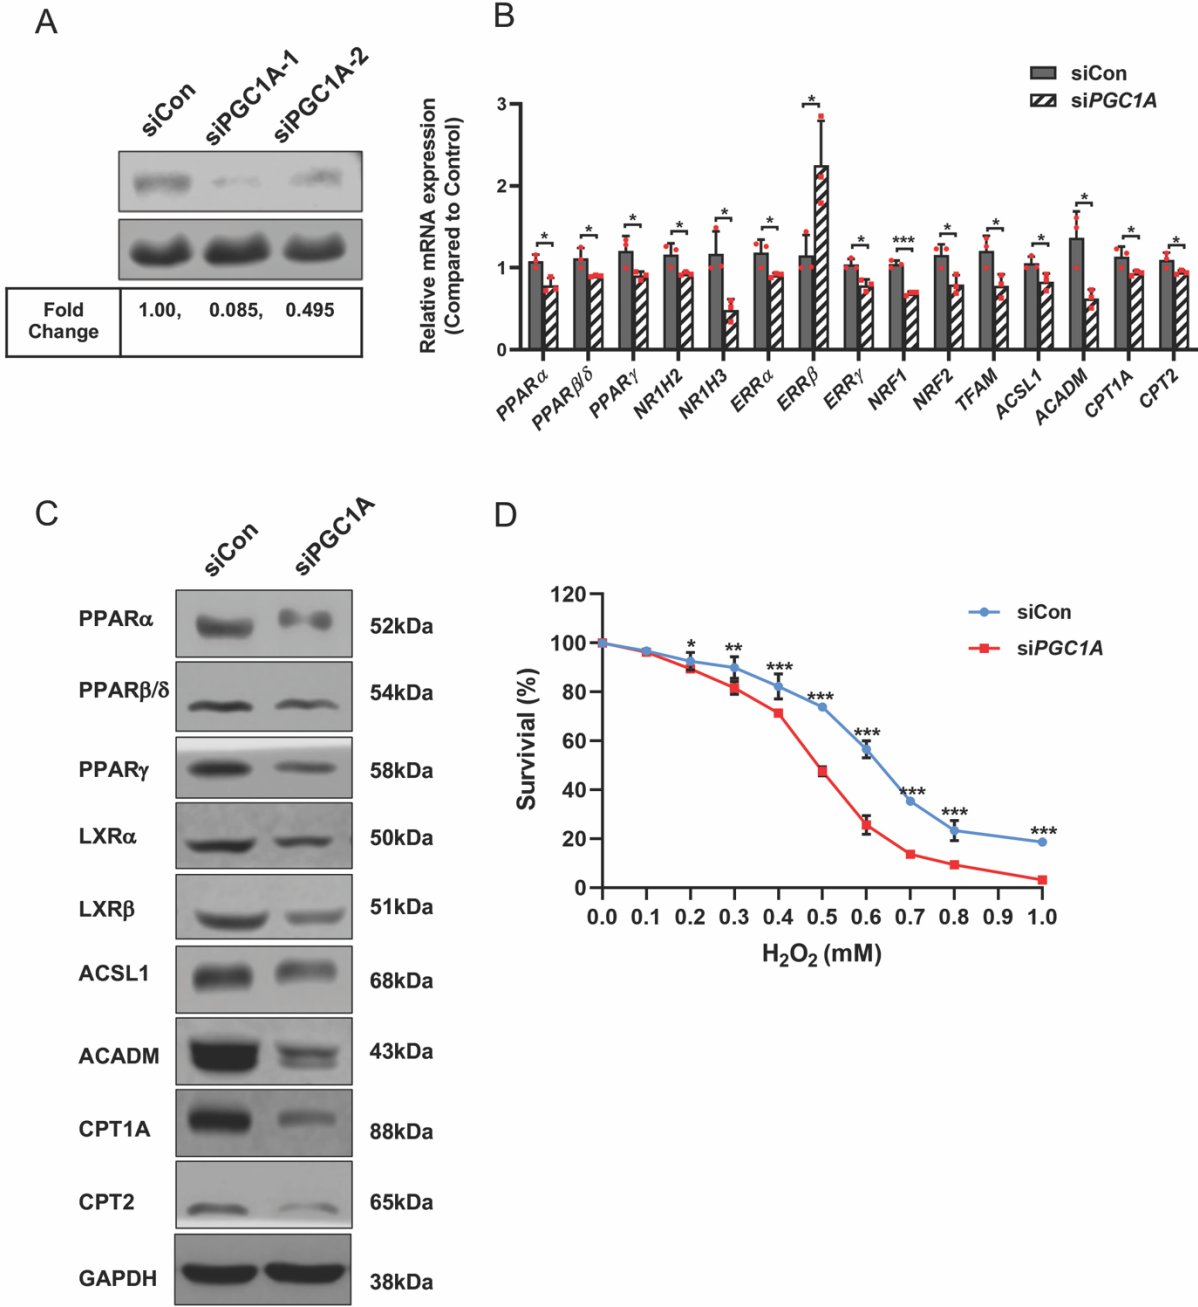

**S-Figure-2. Inhibition of *PGC1A* by siRNA reduced the expression of PPARs, LXRs and fatty acid  $\beta$ -oxidation related components, decreased the expression of mitochondrial biosynthesis related genes, and increased the susceptibility to oxidative stress.**

ARPE19 cells were transfected with 2 different siRNAs, respectively, and the mRNA and protein were extracted in 72h to perform qPCR and Western blots. **(A)** *PGC1 $\alpha$*  protein was inhibited ~ 90% by siRNA1 and ~50% by siRNA2 as compared with the control group. We chose siRNA1 for the following experiments. **(B)** The mRNA levels of *PPAR $\alpha$* , *PPAR $\beta$* , *PPAR $\gamma$* , *NR1H3* & *NR1H2*; *ERR $\alpha$* , *ERR $\beta$* , *ERR $\gamma$* , *NRF1*, *NFE2L2*, *TFAM*; *ACSL1*, *ACADM*, *CPT1A* and *CPT2* (n=3) in ARPE19-si*PGC1A* and control cell lines. **(C)** The protein levels of the PPARs, LXRs, and fatty acid  $\beta$ -oxidation-related components. **(D)** Inhibition of *PGC1A* by siRNA1 declined ARPE19 cell viability with increasing concentration of  $H_2O_2$  treatment for 24h, (n=3). An unpaired *t*-test was performed using GraphPad Prism 8.3.0. Graph represents mean  $\pm$  SEM, \**P* $\leq$ 0.05, \*\**P* $\leq$ 0.01, \*\*\* *P* $\leq$ 0.001.

S-Figure3

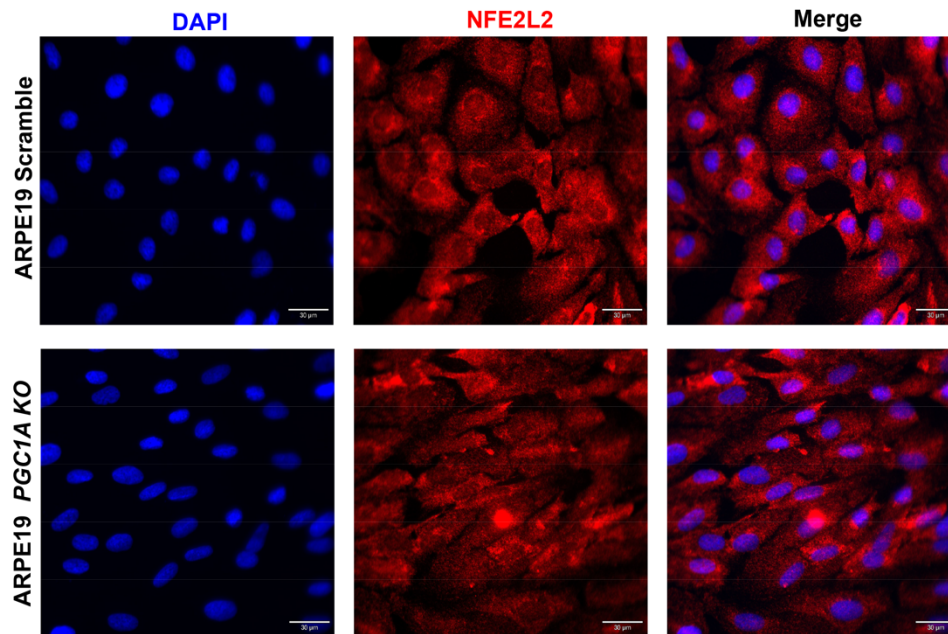

**S-Figure-3. Inhibiting *PGC1A* does not affect the nuclear localization of NFE2L2 in ARPE19 cells.**

Immunofluorescence images of NFE2L2 in ARPE19 PGC1A KO and the Scramble control cells.

Cells were seeded in a 35mm glass bottom confocal dish for 24h, and fixed in 4% formaldehyde for 15min at room temperature, then permeabilized with 0.25% Triton™ X-100 for 10 minutes. Cells were blocked with 5% BSA for 1hr at room temperature, followed by 3 washes with PBS, and overnight incubation with the primary antibody at 4°C. Cells were incubated with the secondary antibody the next day for 1hr at room temperature and mounted for imaging. The corresponding primary and secondary antibodies with their respective dilution factors are shown in Table. S2. NFE2L2 is stained in red (AlexaFluor 594), and nuclei were counterstained with DAPI (blue, 0100-20; Southern Biotech). Scale bars: 30 μm.

**Table.S1. Primers used for qPCR analyses.**

| <b>Primer Name</b>                   | <b>Primer Sequence (5'-3')</b> |
|--------------------------------------|--------------------------------|
| human <i>PPAR</i> $\alpha$ FOR       | TTCGCAATCCATCGGCGAG            |
| human <i>PPAR</i> $\alpha$ REV       | CCACAGGATAAGTCACCGAGG          |
| human <i>PPAR</i> $\beta/\delta$ FOR | CAGGGCTGACTGCAAACGA            |
| human <i>PPAR</i> $\beta/\delta$ REV | CTGCCACAATGTCTCGATGTC          |
| human <i>PPAR</i> $\gamma$ FOR       | TACTGTCCGTTTCAGAAATGCC         |
| human <i>PPAR</i> $\gamma$ REV       | GTCAGCGGACTCTGGATTGAG          |
| human <i>NR1H2</i> FOR               | AGAACTAATGATCCAGCAGTTGG        |
| human <i>NR1H2</i> REV               | TTGCTTAGCGAAGTCCACGAT          |
| human <i>NR1H3</i> FOR               | CCTTCAGAACCCACAGAGATCC         |
| human <i>NR1H3</i> REV               | ACGCTGCATAGCTCGTTCC            |
| human <i>CPT1A</i> FOR               | ATCAATCGGACTCTGGAAACGG         |
| human <i>CPT1A</i> REV               | TCAGGGAGTAGCGCATGGT            |
| human <i>CPT2</i> FOR                | CATACAAGCTACATTTTCGGGACC       |
| human <i>CPT2</i> REV                | AGCCCGGAGTGTCTTCAGAA           |
| human <i>ACSL1</i> FOR               | CTTATGGGCTTCGGAGCTTTT          |
| human <i>ACSL1</i> REV               | CAAGTAGTGCGGATCTTCGTG          |
| human <i>ACADM</i> FOR               | ACAGGGGTTTCAGACTGCTATT         |
| human <i>ACADM</i> REV               | TCCTCCGTTGGTTATCCACAT          |
| human <i>DGAT1</i> FOR               | CAATCTGACCTACCGCGATCT          |
| human <i>DGAT1</i> REV               | TCGATGATGCGTGAGTAGTCC          |
| human <i>DGAT2</i> FOR               | GAATGGGAGTGGCAATGCTAT          |
| human <i>DGAT2</i> REV               | CCTCGAAGATCACCTGCTTGT          |
| human <i>SOAT1</i> FOR               | CAAGGCGCTCTCTTTAGATG           |
| human <i>SOAT1</i> REV               | GGTCCAACAACGGTAGGAAA           |

| <b>Primer Name</b>                      | <b>Primer Sequence (5'-3')</b> |
|-----------------------------------------|--------------------------------|
| human <i>SOAT2</i> FOR                  | ATGGAAACACTGAGACGCACA          |
| human <i>SOAT2</i> REV                  | GGTAGGATTGTATAGCCTCCCG         |
| human <i>FATP2</i> FOR                  | GGCGCTCCTTATGGGTAACG           |
| human <i>FATP2</i> REV                  | CTTGCCAGTATCTCTTCGACAG         |
| human <i>FABP4</i> FOR                  | ACTGGGCCAGGAATTTGACG           |
| human <i>FABP4</i> REV                  | CTCGTGGAAGTGACGCCTT            |
| human <i>CD36</i> FOR                   | AAGCCAGGTATTGCAGTTCTTT         |
| human <i>CD36</i> REV                   | GCATTTGCTGATGTCTAGCACA         |
| human <i>ERR<math>\alpha</math></i> FOR | AGGGTTCCTCGGAGACAGAG           |
| human <i>ERR<math>\alpha</math></i> REV | TCACAGGATGCCACACCATAG          |
| human <i>ERR<math>\beta</math></i> FOR  | TGGAGGCCGTCAGAAATACAA          |
| human <i>ERR<math>\beta</math></i> REV  | CAATGGCTTTTTAGCAGGTGGA         |
| human <i>ERR<math>\gamma</math></i> FOR | GCCCTCACTACACTGTGTGAC          |
| human <i>ERR<math>\gamma</math></i> REV | CCTGCTAATTTGGACTGGTCTT         |
| human <i>NRF1</i> FOR                   | GCTGATGAAGACTCGCCTTCT          |
| human <i>NRF1</i> REV                   | TACATGAGGCCGTTTCCGTTT          |
| human <i>NFE2L2</i> FOR                 | TCCAGTCAGAAACCAGTGGAT          |
| human <i>NFE2L2</i> REV                 | GAATGTCTGCGCCAAAAGCTG          |
| human <i>TFAM</i> FOR                   | ATGGCGTTTCTCCGAAGCAT           |
| human <i>TFAM</i> REV                   | TCCGCCCTATAAGCATCTTGA          |
| human <i>ND1</i> FOR                    | CCTAGCCGTTTACTCAATCCT          |
| human <i>ND1</i> REV                    | TGATGGCTAGGGTGACTTCAT          |
| human <i>ACTB</i> FOR                   | CATCTCTTGCTCGAAGTCCA           |
| human <i>ACTB</i> REV                   | ATCATGTTTGAGACCTTCAACA         |
| human <i>GAPDH</i> FOR                  | GGAGCGAGATCCCTCCAAAAT          |
| human <i>GAPDH</i> REV                  | GGCTGTTGTCATACTTCTCATGG        |

| <b>Primer Name</b>                                     | <b>Primer Sequence (5'-3')</b>                     |
|--------------------------------------------------------|----------------------------------------------------|
| human <i>DRP1</i> FOR<br>human <i>DRP1</i> REV         | TTTGACACTTGTGGATTTGCCA<br>AGTGACAGCGAGGATAATGGA    |
| human <i>OPA1</i> FOR<br>human <i>OPA1</i> REV         | TGTGAGGTCTGCCAGTCTTTA<br>TGCCTTAATTGGGGTTCGTTG     |
| human <i>NDUFS2</i> FOR<br>human <i>NDUFS2</i> REV     | GCTGTTATGTACCCAAGCAAAGA<br>TCCCCACTCAATTCCATCACT   |
| human <i>NDUFS8</i> FOR<br>human <i>NDUFS8</i> REV     | CCATCAACTACCCGTTTCGAGA<br>CCGCAGTAGATGCACTTGG      |
| human <i>CDS1</i> FOR<br>human <i>CDS1</i> REV         | AGTTCCTCATTCGCTACCATAGA<br>GGTGTGACTGAGTGACAGTTATC |
| human <i>PGS1</i> FOR<br>human <i>PGS1</i> REV         | TCGTGATGGCATCCCTCTAC<br>CCCCGCGTGAAGTCTAAGA        |
| human <i>PTPMT1</i> FOR<br>human <i>PTPMT1</i> REV     | CAGAGGAGGCTGTAAGAGCCA<br>TGTGGATGTATGACCGGATCT     |
| human <i>CRLS1</i> FOR<br>human <i>CRLS1</i> REV       | AGCAGTCCAGTTAATCTTGGTG<br>AGTCTTCCGGCCATAATGATAGT  |
| human <i>TAFFAZIN</i> FOR<br>human <i>TAFFAZIN</i> REV | CACCGTGTCCAATCACCAGTC<br>TCCAACGCATCAACTTCAGGT     |
| human <i>SOD1</i> FOR<br>human <i>SOD1</i> REV         | AGGGCATCATCAATTTTCGAGC<br>GCCACCGTGTTTTCTGGA       |
| human <i>SOD2</i> FOR<br>human <i>SOD2</i> REV         | CAGACCTGCCTTACGACTATGG<br>CGTTCAGGTTGTTACGTAGG     |
| human <i>CAT</i> FOR<br>human <i>CAT</i> REV           | ACTTTGAGGTCACACATGACATT<br>CTGAACCCGATTCTCCAGCA    |



**Table. S2. Antibodies used for Western blots and Immunofluorescence.**

| Antibody            | Source | Vendor                         | Cat. No     | dilution |
|---------------------|--------|--------------------------------|-------------|----------|
| PGC1 $\alpha$       | Rabbit | Millipore Sigma, USA           | AB3242      | 1:1000   |
| ACADM               | Rabbit | Proteintech Group, USA         | 55210-1-AP  | 1:1000   |
| CPT1A               | Rabbit | Proteintech Group, USA         | 15184-1-AP  | 1:1000   |
| ACSL1               | Rabbit | Proteintech Group, USA         | 13989-1-AP  | 1:1000   |
| PPAR $\alpha$       | Rabbit | Proteintech Group, USA         | 15540-1-AP  | 1:600    |
| PPAR $\beta/\delta$ | Mouse  | Proteintech Group, USA         | 60193-1-Ig  | 1:1000   |
| NR1H3               | Rabbit | Proteintech Group, USA         | 14351-1-AP  | 1:2000   |
| NR1H2               | Mouse  | Proteintech Group, USA         | 60345-1-Ig  | 1:800    |
| FABP4               | Rabbit | Proteintech Group, USA         | 12802-1-AP  | 1:5000   |
| SOAT2               | Rabbit | Proteintech Group, USA         | 21852-1-AP  | 1:1000   |
| SOAT1               | Rabbit | Cell signal technology, USA    | 35695       | 1:1000   |
| CPT2                | Rabbit | Proteintech Group, USA         | 26555-1-AP  | 1:1000   |
| DGAT1               | Rabbit | Proteintech Group, USA         | 11561-1-AP  | 1:1000   |
| DGAT2               | Rabbit | Proteintech Group, USA         | 17100-1-AP  | 1:1000   |
| PTPMT1              | Rabbit | Proteintech Group, USA         | 11493-1-AP  | 1:300    |
| FATP2               | Rabbit | Proteintech Group, USA         | 14048-1-AP  | 1:2000   |
| CD36                | Rabbit | Proteintech Group, USA         | 18836-1-AP  | 1:1000   |
| PPAR $\gamma$       | Rabbit | Proteintech Group, USA         | 16643-1-AP  | 1:2000   |
| PGS1                | Rabbit | Proteintech Group, USA         | 17149-1-AP  | 1:500    |
| CRLS1               | Rabbit | Proteintech Group, USA         | 51055-1-AP  | 1:300    |
| TAFFAZIN            | Mouse  | Santa Cruz Biotechnology, USA  | SC-365810   | 1:500    |
| GAPDH               | Rabbit | Cell Signaling Technology, USA | 5174S       | 1:8000   |
| anti-Mouse IgG      | Goat   | Jackson ImmunoResearch         | 115-035-003 | 1:4000   |
| anti-Rabbit IgG     | Goat   | Jackson ImmunoResearch         | 111-035-003 | 1:4000   |

| Antibody                                          | Source | Vendor                         | Cat. No    | dilution              |
|---------------------------------------------------|--------|--------------------------------|------------|-----------------------|
| ABCA1                                             | Rabbit | Cell signaling Technology, USA | 96292S     | 1:1000                |
| HMGCR                                             | Rabbit | Thermo Fisher Scientific, USA  | PA5-37367  | 1:1000                |
| ABCG1                                             | Rabbit | Proteintech Group, USA         | 13578-1-AP | 1:1000                |
| ABCG5                                             | Rabbit | Proteintech Group, USA         | 27722-1-AP | 1:800                 |
| LDLR                                              | Rabbit | Proteintech Group, USA         | 10785-1-AP | 1:2000                |
| Phospho-HMGCR<br>(Ser872)                         | Rabbit | Thermo Fisher Scientific, USA  | BS-4063R   | 1:1000                |
| SOD2                                              | Rabbit | Cell signaling Technology, USA | 13141S     | 1:1000                |
| Catalase                                          | Rabbit | Cell signaling Technology, USA | 14097S     | 1:1000                |
| AMPK $\alpha$                                     | Rabbit | Cell signaling Technology, USA | 5832S      | 1:1000                |
| Phospho-AMPK $\alpha$ (Thr172)                    | Rabbit | Cell signaling Technology, USA | 2535S      | 1:1000                |
| NFE2L2                                            | Rabbit | Proteintech Group, USA         | 80593-1-RR | WB 1:1000<br>IF 1:500 |
| Donkey anti-Rabbit IgG Antibody, Alexa Fluor® 594 | Donkey | Thermo Fisher Scientific, USA  | R37119     | 1:2000                |
